# Supplementary material
Source: PubMed Central journal article supplement (PMC3747717)
Supplement: supp_13-11620_IOVS-13-11620-s01.pdf [file supp_13-11620_IOVS-13-11620-s01.pdf]

**Supplementary Table S1.** Flow rate data of perfused human eyes. Values are in  $\mu\text{l}/\text{min}$ .

| Eye Identifier | Treatment | Av. Baseline flow rate | Av. Flow rate after lentivirus application | Flow rate following 2x pressure | Flow rate following homeostatic response |
|----------------|-----------|------------------------|--------------------------------------------|---------------------------------|------------------------------------------|
| 2012-1311OS    | shTNC     | 3.68                   | 3.79                                       | NA                              | NA                                       |
| 2012-0278OS    | shTNC     | 5.16                   | 5.21                                       | NA                              | NA                                       |
| 2012-1305OD    | shTNC     | 1.75                   | 2.97                                       | NA                              | NA                                       |
| 2012-0218OS    | shTNC     | 4.00                   | 4.02                                       | NA                              | NA                                       |
| 2012-0225OS    | shTNC     | 1.92                   | 1.43                                       | NA                              | NA                                       |
|                |           |                        |                                            |                                 |                                          |
| 2012-1305OS    | shCtrl    | 6.45                   | 6.59                                       | NA                              | NA                                       |
| 2012-0226OD    | shCtrl    | 4.08                   | 4.10                                       | NA                              | NA                                       |
| 2012-0226OS    | shCtrl    | 6.63                   | 6.84                                       | NA                              | NA                                       |
| 2012-1311OD    | shCtrl    | 2.01                   | 2.33                                       | NA                              | NA                                       |
| 2009-0870OS    | shCtrl    | 1.69                   | 1.21                                       | NA                              | NA                                       |
| 2009-0871OS    | shCtrl    | 6.36                   | 6.47                                       | NA                              | NA                                       |
|                |           |                        |                                            |                                 |                                          |
| 2012-1303OD    | shTNC     | 4.7                    | 4.6                                        | 5.8                             | 11.2                                     |
| 2012-0651OS    | shTNC     | 6.01                   | 5.81                                       | 15.6                            | 10.4                                     |
| 2012-0377OD    | shTNC     | 1.84                   | 1.35                                       | 2.18                            | 4.97                                     |
| 2012-0377OS    | shTNC     | 3.63                   | 3.25                                       | 4.16                            | 8.47                                     |
|                |           |                        |                                            |                                 |                                          |
| 2012-1306OD    | shCtrl    | 5.39                   | 5.89                                       | 11.16                           | 12.48                                    |
| 2012-1306OS    | shCtrl    | 3.45                   | 3.6                                        | 14.95                           | 17.08                                    |
| 2012-0651OD    | shCtrl    | 3.744                  | 3.742                                      | 8.5                             | 11.5                                     |

**Supplementary Table S2.** Flow rate data of perfused porcine eyes. Values are in  $\mu\text{l}/\text{min}$ .

| Eye Identifier | Treatment | Av. Baseline flow rate | Av. Flow rate after lentivirus application | Flow rate following 2x pressure | Flow rate following homeostatic response |
|----------------|-----------|------------------------|--------------------------------------------|---------------------------------|------------------------------------------|
| 5 092112       | shTNC     | 1.39                   | 1.23                                       | NA                              | NA                                       |
| 6              | shTNC     | 1.60                   | 1.53                                       | NA                              | NA                                       |
| 7              | shTNC     | 1.54                   | 1.62                                       | NA                              | NA                                       |
| 8              | shTNC     | 2.72                   | 2.72                                       | NA                              | NA                                       |
| 10             | shTNC     | 2.13                   | 2.45                                       | NA                              | NA                                       |
| 2 040612       | shTNC     | 2.01                   | 2.24                                       | NA                              | NA                                       |
| 3              | shTNC     | 2.24                   | 2.50                                       | NA                              | NA                                       |
| 6              | shTNC     | 1.02                   | 1.03                                       | NA                              | NA                                       |
| 8              | shTNC     | 1.33                   | 1.38                                       | NA                              | NA                                       |
| 9              | shTNC     | 1.23                   | 1.10                                       | NA                              | NA                                       |
| 1 092112       | shCtrl    | 2.35                   | 2.27                                       | NA                              | NA                                       |
| 2              | shCtrl    | 1.40                   | 1.004                                      | NA                              | NA                                       |
| 3              | shCtrl    | 3.81                   | 2.29                                       | NA                              | NA                                       |
| 4              | shCtrl    | 2.11                   | 2.50                                       | NA                              | NA                                       |
| 4 040612       | shCtrl    | 7.87                   | 7.38                                       | NA                              | NA                                       |
| 5              | shCtrl    | 3.57                   | 3.26                                       | NA                              | NA                                       |
| 10             | shCtrl    | 2.84                   | 2.85                                       | NA                              | NA                                       |
| 1 031612       | shCtrl    | 2.98                   | 3.14                                       | NA                              | NA                                       |
| 5 091611       | shCtrl    | 1.10                   | 1.04                                       | NA                              | NA                                       |
|                |           |                        |                                            |                                 |                                          |
| 1 042712       | shTNC     | 4.98                   | 4.41                                       | 9.38                            | 12.12                                    |
| 2              | shTNC     | 3.05                   | 3.23                                       | 6.3                             | 7.06                                     |
| 3              | shTNC     | 6.12                   | 4.03                                       | 11.7                            | 15.12                                    |
| 4              | shTNC     | 7.93                   | 3.16                                       | 7.97                            | 19.65                                    |
| 7 101212       | shTNC     | 1.98                   | 2.37                                       | 10.4                            | 16.96                                    |
| 8              | shTNC     | 1.14                   | 0.92                                       | 2.02                            | 7.06                                     |
| 9              | shTNC     | 2.58                   | 3.36                                       | 12.42                           | 15.03                                    |
| 10             | shTNC     | 1.83                   | 2.02                                       | 9.18                            | 11.91                                    |
| 6 030411       | shTNC     | 5.84                   | 5.09                                       | 6.1                             | 18.87                                    |
| 7              | shTNC     | 3.64                   | 2.83                                       | 11.55                           | 13.17                                    |
| 9              | shTNC     | 2.62                   | 2.52                                       | 3.11                            | 6.51                                     |
| 10             | shTNC     | 7.35                   | 4.99                                       | 9.88                            | 16.61                                    |
| 1 101212       | shCtrl    | 1.00                   | 1.16                                       | 4.7                             | 11.13                                    |
| 2              | shCtrl    | 2.05                   | 1.95                                       | 5.32                            | 7.1                                      |
| 3              | shCtrl    | 5.79                   | 6.25                                       | 23.7                            | 24.24                                    |
| 4              | shCtrl    | 2.55                   | 2.87                                       | 8.5                             | 9.48                                     |
| 5              | shCtrl    | 3.26                   | 3.57                                       | 11.7                            | 14.24                                    |
| 5 042712       | shCtrl    | 3.72                   | 2.79                                       | 14.4                            | 19.3                                     |
| 6              | shCtrl    | 1.34                   | 1.25                                       | 3.12                            | 5.31                                     |

|          |        |      |      |       |       |
|----------|--------|------|------|-------|-------|
| 7        | shCtrl | 3.62 | 2.91 | 8.82  | 15.5  |
| 8        | shCtrl | 2.41 | 2.39 | 5.35  | 5.63  |
| 1 030411 | shCtrl | 3.63 | 2.87 | 6.13  | 9.64  |
| 2        | shCtrl | 5.76 | 6.11 | 11.88 | 14.69 |
| 3        | shCtrl | 7.13 | 5.59 | 11.77 | 22.41 |
